# Supplementary material for: Publication rates in animal research. Extent and characteristics of published and non-published animal studies followed up at two German university medical centres
Source: PLoS One. 2019 Nov 26;14(11):e0223758. doi: 10.1371/journal.pone.0223758 (PMC6879110; doi:10.1371/journal.pone.0223758)
Supplement: S1 Table — Raw data of included proposals, cut for data that might allow identification of involved persons. (XLSX) [file pone.0223758.s001.xlsx]

## Sheet: Auswertung_anonym
Year (end of approval)	basic_preclinical	chronic/acute	Species	Internal number	animal number > 207 (1=ja)	third party funding	publication found	Institution	rodent_non_rodent	conduct certain	number of publications per proposal	assignment publication-proposal certain - reference number given	days end of proposal to first publication	only phd theses
2007	b	c	mouse	studysite1-2007-1	1	yes	yes	studysite1	rodent	yes	1	no	1154	no
2007	p	c	mouse	studysite1-2007-2	0	no	no	studysite1	rodent	no	0	0	#NULL!	-
2007	p	c	rabbit	studysite1-2007-3	0	yes	no	studysite1	non-rode	yes	0	0	#NULL!	-
2007	p	c	mouse	studysite1-2007-4	0	yes	yes	studysite1	rodent	yes	1	no	289	no
2007	p	a	pig	studysite1-2007-5	0	yes	yes	studysite1	non-rode	no	2	yes	-145	no
2007	p	c	mouse	studysite1-2007-6	1	no	no	studysite1	rodent	no	0	0	#NULL!	-
2007	p b	c	rat	studysite1-2007-7	1	no	no	studysite1	rodent	no	0	0	#NULL!	-
2007	p b	c	mouse	studysite1-2007-8	1	yes	no	studysite1	rodent	no	0	0	#NULL!	-
2007	p	c	mouse	studysite1-2007-9	0	yes	no	studysite1	rodent	no	0	0	#NULL!	-
2007	p b	c	mouse	studysite1-2007-10	0	yes	yes	studysite1	rodent	yes	1	no	-148	no
2007	p b	c	mouse	studysite1-2007-11	0	yes	no	studysite1	rodent	yes	0	0	#NULL!	-
2007	p b	c	mouse	studysite1-2007-12	1	yes	yes	studysite1	rodent	no	1	no	80	no
2007	s	a	rabbit	studysite1-2007-13	0	yes	no	studysite1	non-rode	no	0	0	#NULL!	-
2007	p b	a/c	mouse	studysite1-2007-14	0	yes	no	studysite1	rodent	no	0	0	#NULL!	-
2007	b	c	mouse	studysite1-2007-15	1	n.n.	yes	studysite1	rodent	yes	1	no	3113	no
2008	p	a	mouse	studysite1-2008-1	1	yes	no	studysite1	rodent	no	0	0	#NULL!	-
2008	b	c	rabbit	studysite1-2008-2	0	yes	no	studysite1	non-rode	no	0	0	#NULL!	-
2008	p b	c	mouse	studysite1-2008-3	0	no	yes	studysite1	rodent	no	1	no	517	no
2008	p b	c	rat	studysite1-2008-4	0	yes	no	studysite1	rodent	no	0	0	#NULL!	-
2008	p	c	mouse	studysite1-2008-5	1	yes	no	studysite1	rodent	no	0	0	#NULL!	-
2008	p b	c	mouse	studysite1-2008-6	0	yes	yes	studysite1	rodent	yes	1	no	1188	no
2008	p b	c	rat	studysite1-2008-7	1	yes	no	studysite1	rodent	no	0	0	#NULL!	-
2008	p b	c	rat	studysite1-2008-8	0	yes	no	studysite1	rodent	no	0	0	#NULL!	-
2008	p b	c	mouse	studysite1-2008-9	1	yes	yes	studysite1	rodent	no	1	no	27	no
2008	b	c	mouse	studysite1-2008-10	1	yes	no	studysite1	rodent	yes	0	0	#NULL!	-
2008	b	c	mouse	studysite1-2008-11	0	yes	yes	studysite1	rodent	no	1	no	-271	no
2008	p b	c	cat	studysite1-2008-12	0	yes	no	studysite1	non-rode	no	0	0	#NULL!	-
2008	p b	c	rabbit	studysite1-2008-13	0	yes	no	studysite1	non-rode	no	0	0	#NULL!	-
2008	p	c	rat	studysite1-2008-14	0	yes	yes	studysite1	rodent	no	1	no	687	no
2008	p b	c	mouse	studysite1-2008-15	1	yes	yes	studysite1	rodent	no	1	no	533	no
2009	p b	a	guinea pig	studysite1-2009-1	0	yes (auch Eigenmittel)	yes	studysite1	rodent	yes	2	yes	1201	no
2009	p b	c	mouse	studysite1-2009-2	1	yes	yes	studysite1	rodent	no	1	yes	1602	no
2009	p b	a/c	rat	studysite1-2009-3	1	yes	yes	studysite1	rodent	no	2	no	-196	no
2009	p b	c	rat	studysite1-2009-4	1	yes (auch Eigenmittel)	yes	studysite1	rodent	yes	2	yes	-475	yes
2009	p b	c	sheep	studysite1-2009-5	0	no	yes	studysite1	non-rode	no	1	no	335	no
2009	p b	c	sheep, pig	studysite1-2009-6	0	yes	no	studysite1	non-rode	no	0	0	#NULL!	-
2009	b	c	rat	studysite1-2009-7	0	no	yes	studysite1	rodent	yes	1	no	1499	no
2009	p b	c	mouse	studysite1-2009-8	0	no	no	studysite1	rodent	yes	0	0	#NULL!	-
2009	p b	c	rat	studysite1-2009-9	1	yes	yes	studysite1	rodent	no	1	no	587	no
2009	p b	c	mouse	studysite1-2009-10	0	no	yes	studysite1	rodent	no	1	no	-295	no
2009	p	c	sheep	studysite1-2009-11	0	yes	yes	studysite1	non-rode	no	1	yes	1299	no
2009	p b	c	rat	studysite1-2009-12	1	yes	yes	studysite1	rodent	yes	1	yes	-121	yes
2009	b	c	mouse	studysite1-2009-13	0	yes	no	studysite1	rodent	no	0	0	#NULL!	-
2009	p b	a/c	mouse	studysite1-2009-14	1	yes	yes	studysite1	rodent	yes	1	yes	1304	no
2009	p b	a/c	rat	studysite1-2009-15	1	yes	yes	studysite1	rodent	yes	1	no	369	no
2010	p b	a	mouse	studysite1-2010-1	0	yes	no	studysite1	rodent	yes	0	0	#NULL!	-
2010	p	c	mouse	studysite1-2010-2	1	yes	yes	studysite1	rodent	yes	1	no	-815	no
2010	b	c	mouse	studysite1-2010-3	1	yes	yes	studysite1	rodent	yes	1	no	861	no
2010	p b	a/c	cat	studysite1-2010-4	0	yes	no	studysite1	non-rode	yes	0	0	#NULL!	-
2010	p b	c	rat	studysite1-2010-5	1	yes	no	studysite1	rodent	no	0	0	#NULL!	-
2010	p b	c	rat	studysite1-2010-6	1	yes	no	studysite1	rodent	no	0	0	#NULL!	-
2010	b	c	rat	studysite1-2010-7	1	yes	no	studysite1	rodent	no	0	0	#NULL!	-
2010	p b	c	mouse	studysite1-2010-8	0	yes	yes	studysite1	rodent	yes	1	no	232	no
2010	p b	c	rat	studysite1-2010-9	1	yes	yes	studysite1	rodent	yes	3	yes	-482	no
2010	p	a	pig	studysite1-2010-10	0	yes	yes	studysite1	non-rode	no	2	no	-305	no
2010	p	c	mouse	studysite1-2010-11	1	yes	yes	studysite1	rodent	no	1	no	-82	no
2010	b	c	mouse	studysite1-2010-12	0	yes	yes	studysite1	rodent	no	1	no	-1053	no
2010	p	a/c	sheep	studysite1-2010-13	0	yes	yes	studysite1	non-rode	yes	2	yes	-313	no
2010	b	c	mouse	studysite1-2010-14	1	no	no	studysite1	rodent	yes	0	0	#NULL!	-
2010	p	c	mouse	studysite1-2010-15	0	yes	yes	studysite1	rodent	yes	2	yes	-619	no
2011	b	c	mouse	studysite1-2011-1	1	yes	no	studysite1	rodent	yes	0	0	#NULL!	-
2011	p b	a/c	mouse	studysite1-2011-2	0	yes	yes	studysite1	rodent	no	1	no	-49	no
2011	p b	c	rat	studysite1-2011-3	0	yes	yes	studysite1	rodent	no	2	no	-714	no
2011	b	c	mouse	studysite1-2011-4	1	yes	no	studysite1	rodent	yes	0	0	#NULL!	-
2011	p b	c	mouse	studysite1-2011-5	0	no	yes	studysite1	rodent	no	1	no	-761	no
2011	p b	c	mouse	studysite1-2011-6	1	yes	no	studysite1	rodent	no	0	0	#NULL!	-
2011	p	a	pig	studysite1-2011-7	0	no	yes	studysite1	non-rode	no	1	no	45	no
2011	p	c	Gerbil	studysite1-2011-8	1	yes	yes	studysite1	rodent	yes	1	yes	861	no
2011	b	a	pig	studysite1-2011-9	0	yes	yes	studysite1	non-rode	yes	1	no	1134	no
2011	b	c	mouse	studysite1-2011-10	0	yes	yes	studysite1	rodent	no	1	no	-834	no
2011	b	c	mouse	studysite1-2011-11	0	yes	no	studysite1	rodent	no	0	0	#NULL!	-
2011	p	a	pig	studysite1-2011-12	0	no	yes	studysite1	non-rode	yes	1	yes	-401	no
2011	b	c	mouse	studysite1-2011-13	1	yes	yes	studysite1	rodent	no	1	no	581	no
2011	p b	c	mouse	studysite1-2011-14	0	yes	yes	studysite1	rodent	yes	1	no	-140	no
2011	b	c	mouse	studysite1-2011-15	1	yes	no	studysite1	rodent	no	0	0	#NULL!	-
2012	p b	c	mouse	studysite1-2012-1	1	no	yes	studysite1	rodent	yes	1	no	688	no
2012	p	c	pig	studysite1-2012-2	0	yes	yes	studysite1	non-rode	yes	1	yes	261	no
2012	b	c	mouse	studysite1-2012-3	1	yes	no	studysite1	rodent	yes	0	0	#NULL!	-
2012	p b	a/c	cat	studysite1-2012-4	0	yes	no	studysite1	non-rode	yes	0	0	#NULL!	-
2012	p b	c	mouse	studysite1-2012-5	0	yes	yes	studysite1	rodent	no	1	yes	342	no
2012	p b	c	mouse	studysite1-2012-6	0	yes	yes	studysite1	rodent	yes	1	no	106	no
2012	p b	c	mouse	studysite1-2012-7	1	no	no	studysite1	rodent	no	0	0	#NULL!	-
2012	p b	c	mouse	studysite1-2012-8	1	no	no	studysite1	rodent	yes	0	0	#NULL!	-
2012	b	c	mouse	studysite1-2012-9	0	yes	no	studysite1	rodent	no	0	0	#NULL!	-
2012	p b	a	rat	studysite1-2012-10	0	no	no	studysite1	rodent	yes	0	0	#NULL!	-
2012	p b	c	sheep	studysite1-2012-11	0	no	yes	studysite1	non-rode	no	2	yes	1103	no
2012	b	c	mouse	studysite1-2012-12	1	no	no	studysite1	rodent	yes	0	0	#NULL!	-
2012	b	c	mouse	studysite1-2012-13	1	no	no	studysite1	rodent	no	0	0	#NULL!	-
2012	p b	c	mouse	studysite1-2012-14	1	yes	yes	studysite1	rodent	yes	1	yes	245	no
2012	s b	c	rat	studysite1-2012-15	0	yes	yes	studysite1	rodent	yes	1	yes	640	no
2013	p b	c	Amphibia	studysite1-2013-1	0	yes	yes	studysite1	non-rode	yes	2	yes	415	no
2013	p b	c	mouse	studysite1-2013-2	1	yes	yes	studysite1	rodent	yes	1	no	1011	no
2013	b	c	mouse	studysite1-2013-3	1	yes	no	studysite1	rodent	no	0	0	#NULL!	-
2013	p b	c	rat	studysite1-2013-4	1	no	no	studysite1	rodent	yes	0	0	#NULL!	-
2013	p	c	sheep	studysite1-2013-5	0	yes	yes	studysite1	non-rode	yes	1	no	927	no
2013	b	c	mouse	studysite1-2013-6	1	yes	yes	studysite1	rodent	yes	1	no	-99	no
2013	p b	a/c	mouse	studysite1-2013-7	1	yes	yes	studysite1	rodent	yes	2	no	-137	no
2013	b	c	mouse	studysite1-2013-8	0	yes	yes	studysite1	rodent	yes	1	yes	348	no
2013	b	c	mouse	studysite1-2013-9	1	no	no	studysite1	rodent	no	0	0	#NULL!	-
2013	b	a	mouse	studysite1-2013-10	1	yes	yes	studysite1	rodent	yes	1	no	759	no
2013	p	c	mouse	studysite1-2013-11	1	yes	yes	studysite1	rodent	yes	1	no	-1275	no
2013	p s	c	mouse	studysite1-2013-12	1	yes	no	studysite1	rodent	yes	0	0	#NULL!	-
2013	p	a	pig	studysite1-2013-13	0	no	yes	studysite1	non-rode	yes	1	yes	-368	no
2013	b	a	mouse	studysite1-2013-14	1	yes	yes	studysite1	rodent	yes	2	yes	-317	no
2013	b	c	rat	studysite1-2013-15	1	yes	no	studysite1	rodent	yes	0	0	#NULL!	-
2007	p	a	pig	studysite21/07	0	n.b.	no	studysite2	non-rode	yes	0	0	#NULL!	0
2007	p	c	pig	studysite22/07	0	n.b.	yes	studysite2	non-rode	yes	2	no	367	no
2007	b	c	mouse	studysite23/07	0	n.b.	yes	studysite2	rodent	yes	1	no	1684	yes
2007	b	c	mouse	studysite24/07	1	n.b.	yes	studysite2	rodent	yes	1	no	-1551	no
2007	b	c	rat	studysite25/07	1	n.b.	yes	studysite2	rodent	yes	2	no	-922	no
2007	b	c	rat	studysite26/07	0	yes	no	studysite2	rodent	yes	0	0	#NULL!	0
2007	b	c	mouse	studysite27/07	0	yes	no	studysite2	rodent	yes	0	0	#NULL!	0
2007	b	c	rat	studysite28/07	1	yes	yes	studysite2	rodent	yes	1	no	-747	yes
2007	p	c	rat	studysite29/07	0	n.b.	no	studysite2	rodent	yes	0	0	#NULL!	0
2007	p	c	mouse	studysite210/07	0	n.b.	yes	studysite2	rodent	yes	1	no	1078	no
2007	b	c	sheep	studysite211/07	0	yes	yes	studysite2	non-rode	yes	3	yes	422	no
2007	b	c	rat	studysite212/07	1	yes	no	studysite2	rodent	yes	0	0	#NULL!	0
2007	p	c	mouse	studysite213/07	0	n.b.	yes	studysite2	rodent	yes	1	no	732	no
2007	b	c	rat	studysite214/07	0	n.b.	no	studysite2	rodent	yes	0	0	#NULL!	0
2007	b	c	mouse	studysite215/07	1	n.b.	yes	studysite2	rodent	yes	3	yes	-237	no
2008	p	c	pig	studysite21/08	0	n.b.	no	studysite2	non-rode	yes	0	0	#NULL!	0
2008	p	a	pig	studysite22/08	0	n.b.	yes	studysite2	non-rode	yes	1	no	957	no
2008	b	c	mouse, rat	studysite23/08	1	yes	yes	studysite2	rodent	yes	2	no	-177	no
2008	b	c	mouse, rat	studysite24/08	1	yes	yes	studysite2	rodent	yes	1	no	-121	yes
2008	b	c	mouse	studysite25/08	1	n.b.	no	studysite2	rodent	yes	0	0	#NULL!	0
2008	b	c	mouse	studysite26/08	1	n.b.	yes	studysite2	rodent	yes	1	no	-395	no
2008	b	c	rat	studysite27/08	0	n.b.	yes	studysite2	rodent	yes	2	no	-415	no
2008	p	c	rat	studysite28/08	0	yes	no	studysite2	rodent	yes	0	0	#NULL!	0
2008	p	c	mouse	studysite29/08	0	yes	yes	studysite2	rodent	yes	2	no	-569	yes
2008	p	c	rat	studysite210/08	1	yes	yes	studysite2	rodent	yes	2	no	898	no
2008	p	c	pig, sheep	studysite211/08	0	n.b.	no	studysite2	non-rode	yes	0	0	#NULL!	0
2008	b	c	rat	studysite212/08	1	yes	no	studysite2	rodent	yes	0	0	#NULL!	0
2008	b	c	mouse	studysite213/08	0	n.b.	yes	studysite2	rodent	yes	1	no	856	no
2008	b	c	mouse	studysite214/08	1	n.b.	yes	studysite2	rodent	yes	4	no	414	no
2008	p	c	mouse	studysite215/08	0	n.b.	no	studysite2	rodent	yes	0	0	#NULL!	0
2009	p	a	pig	studysite21/09	0	n.b.	yes	studysite2	non-rode	yes	2	yes	427	no
2009	p	a	pig	studysite22/09	0	n.b.	no	studysite2	non-rode	yes	0	0	#NULL!	0
2009	b	c	mouse	studysite23/09	1	yes	yes	studysite2	rodent	yes	1	no	-295	no
2009	b	c	mouse	studysite24/09	1	n.b.	yes	studysite2	rodent	yes	1	no	-755	no
2009	b	c	mouse	studysite25/09	0	n.b.	yes	studysite2	rodent	yes	1	no	299	no
2009	b	c	mouse	studysite26/09	1	n.b.	yes	studysite2	rodent	yes	2	no	-679	no
2009	b	c	mouse	studysite27/09	1	n.b.	yes	studysite2	rodent	yes	1	no	-502	no
2009	p	c	rat	studysite29/09	1	yes	no	studysite2	rodent	yes	0	0	#NULL!	0
2009	p	c	rat	studysite29/09	0	n.b.	yes	studysite2	rodent	yes	1	yes	2067	yes
2009	p	c	rat	studysite210/09	0	n.b.	no	studysite2	rodent	yes	0	0	#NULL!	0
2009	p	c	rabbit	studysite211/09	0	n.b.	yes	studysite2	non-rode	yes	1	no	-333	no
2009	b	c	mouse	studysite212/09	0	yes	no	studysite2	rodent	yes	0	0	#NULL!	0
2009	b	c	rat	studysite213/09	1	yes	no	studysite2	rodent	yes	0	0	#NULL!	0
2009	b	c	rat	studysite214/09	1	yes	no	studysite2	rodent	yes	0	0	#NULL!	0
2009	b	c	rat	studysite215/09	1	yes	yes	studysite2	rodent	yes	1	no	761	no
2010	p	a	pig	studysite21/10	0	n.b.	no	studysite2	non-rode	yes	0	0	#NULL!	0
2010	p	a	pig, sheep	studysite22/10	0	n.b.	yes	studysite2	non-rode	yes	2	no	-298	no
2010	b	c	mouse	studysite23/10	0	yes	no	studysite2	rodent	yes	0	0	#NULL!	0
2010	b	c	mouse	studysite24/10	1	n.b.	yes	studysite2	rodent	yes	1	no	-679	no
2010	b	c	mouse	studysite25/10	1	n.b.	yes	studysite2	rodent	yes	2	no	-243	no
2010	b	c	mouse	studysite26/10	0	yes	no	studysite2	rodent	yes	0	0	#NULL!	0
2010	p b	c	mouse	studysite27/10	0	n.b.	yes	studysite2	rodent	yes	1	no	749	no
2010	p	c	rat	studysite29/10	0	n.b.	yes	studysite2	rodent	yes	1	yes	975	no
2010	p	c	mouse	studysite29/10	1	yes	no	studysite2	rodent	yes	0	0	#NULL!	0
2010	p	c	mouse	studysite210/10	0	yes	no	studysite2	rodent	yes	0	0	#NULL!	0
2010	p	c	pig, sheep	studysite211/10	0	n.b.	no	studysite2	non-rode	yes	0	0	#NULL!	0
2010	b	c	mouse	studysite212/10	1	yes	yes	studysite2	rodent	yes	1	no	-1064	no
2010	b	c	mouse	studysite213/10	1	yes	yes	studysite2	rodent	yes	2	no	-592	no
2010	b	c	rat	studysite214/10	1	yes	yes	studysite2	rodent	yes	2	no	-1025	no
2010	b	c	mouse	studysite215/10	0	yes	yes	studysite2	rodent	yes	1	no	1792	no
2011	p	c	rabbit	studysite21/11	0	n.b.	yes	studysite2	non-rode	yes	1	no	642	no
2011	p	c	pig	studysite22/11	0	n.b.	yes	studysite2	non-rode	yes	2	no	-486	no
2011	b	c	mouse	studysite23/11	1	n.b.	yes	studysite2	rodent	yes	3	no	-404	no
2011	b	c	mouse	studysite24/11	1	n.b.	yes	studysite2	rodent	yes	2	no	-522	no
2011	b	c	mouse, rat	studysite25/11	1	n.b.	yes	studysite2	rodent	yes	1	no	821	no
2011	b	c	mouse	studysite26/11	1	n.b.	yes	studysite2	rodent	yes	3	yes	447	no
2011	b	c	mouse	studysite27/11	0	yes	yes	studysite2	rodent	yes	1	yes	-577	no
2011	b	c	mouse	studysite29/11	0	yes	no	studysite2	rodent	yes	0	0	#NULL!	0
2011	b	c	mouse	studysite29/11	1	n.b.	no	studysite2	rodent	yes	0	0	#NULL!	0
2011	p b	c	mouse	studysite210/11	1	n.b.	yes	studysite2	rodent	yes	1	yes	1427	yes
2011	p	c	pig	studysite211/11	0	n.b.	yes	studysite2	non-rode	yes	1	yes	2164	no
2011	b	c	mouse	studysite212/11	1	n.b.	yes	studysite2	rodent	yes	1	yes	235	no
2011	b	c	rat	studysite213/11	1	yes	yes	studysite2	rodent	yes	2	yes	907	no
2011	b	c	mouse	studysite214/11	1	n.b.	yes	studysite2	rodent	yes	1	yes	469	yes
2011	b	c	mouse	studysite215/11	1	yes	yes	studysite2	rodent	yes	2	yes	1052	no
2012	p	a	cattle	studysite21/12	0	n.b.	yes	studysite2	non-rode	yes	1	no	-232	no
2012	p	a	pig	studysite22/12	0	n.b.	no	studysite2	non-rode	yes	0	0	#NULL!	0
2012	b	c	mouse	studysite23/12	1	yes	yes	studysite2	rodent	yes	1	no	31	no
2012	b	c	mouse	studysite24/12	0	yes	no	studysite2	rodent	yes	0	0	#NULL!	0
2012	b	c	mouse	studysite25/12	1	yes	yes	studysite2	rodent	yes	3	yes	284	no
2012	b	c	rat	studysite26/12	0	n.b.	yes	studysite2	rodent	yes	1	yes	985	yes
2012	b	c	mouse	studysite27/12	1	n.b.	no	studysite2	rodent	yes	0	0	#NULL!	0
2012	b	c	mouse	studysite29/12	1	yes	yes	studysite2	rodent	yes	1	no	-208	no
2012	b	c	mouse	studysite29/12	1	n.b.	no	studysite2	rodent	yes	0	0	#NULL!	0
2012	p	c	rat	studysite210/12	1	n.b.	yes	studysite2	rodent	yes	3	yes	-18	no
2012	p	a	pig	studysite211/12	0	n.b.	yes	studysite2	non-rode	yes	3	yes	-310	no
2012	b	c	mouse	studysite212/12	0	n.b.	no	studysite2	rodent	yes	0	0	#NULL!	0
2012	p	a	rat	studysite213/12	0	n.b.	no	studysite2	rodent	yes	0	0	#NULL!	0
2012	p	c	rat	studysite214/12	0	n.b.	yes	studysite2	rodent	yes	1	no	305	no
2012	b	c	mouse	studysite215/12	0	n.b.	yes	studysite2	rodent	yes	1	yes	2366	yes
2013	p	a	cattle	studysite21/13	0	yes	no	studysite2	non-rode	yes	0	0	#NULL!	0
2013	p	a	pig	studysite22/13	0	n.b.	yes	studysite2	non-rode	yes	1	yes	260	no
2013	b	c	mouse	studysite23/13	1	yes	yes	studysite2	rodent	yes	1	no	-575	yes
2013	b	c	mouse	studysite24/13	1	yes	yes	studysite2	rodent	yes	1	no	-678	yes
2013	b	c	mouse	studysite25/13	1	n.b.	no	studysite2	rodent	yes	0	0	#NULL!	0
2013	b	c	mouse	studysite26/13	1	n.b.	yes	studysite2	rodent	yes	1	no	-86	no
2013	p b	c	rat	studysite27/13	1	yes	yes	studysite2	rodent	yes	1	yes	-221	no
2013	p	c	rat	studysite29/13	0	n.b.	yes	studysite2	rodent	yes	1	no	1034	no
2013	p b	c	mouse	studysite29/13	1	n.b.	yes	studysite2	rodent	yes	2	yes	-931	no
2013	p	c	rat	studysite210/13	1	yes	yes	studysite2	rodent	yes	5	yes	-929	no
2013	b	c	pig	studysite211/13	0	n.b.	yes	studysite2	non-rode	yes	1	yes	341	yes
2013	b	c	mouse	studysite212/13	0	yes	no	studysite2	rodent	yes	0	0	#NULL!	0
2013	b	c	mouse	studysite213/13	0	n.b.	yes	studysite2	rodent	yes	1	no	-1076	no
2013	b	c	mouse	studysite214/13	1	n.b.	yes	studysite2	rodent	yes	1	no	92	no
2013	b	c	mouse	studysite215/13	1	n.b.	yes	studysite2	rodent	yes	1	yes	-278	yes
